# Supplementary material
Source: PubMed Central journal article supplement (PMC6612467)
Supplement: NIHMS1518146-supplement-11682_2018_29_MOESM1_ESM.pdf [file NIHMS1518146-supplement-11682_2018_29_MOESM1_ESM.pdf]

**Evidence of widespread metabolite abnormalities in Myalgic Encephalomyelitis/Chronic Fatigue Syndrome: Assessment with whole-brain Magnetic Resonance Spectroscopy.**

**Brain Imaging and Behavior**

**Christina Mueller, MS**

Department of Psychology, The University of Alabama at Birmingham, 1720 2nd Ave S, Birmingham, AL 35294, United States

**Joanne C. Lin, PhD**

Department of Psychology, The University of Alabama at Birmingham, 1720 2nd Ave S, Birmingham, AL 35294, United States

**Sulaiman Sheriff**

Department of Radiology, Miller School of Medicine, University of Miami, 1600 NW 10th Ave #1140, Miami, FL 33136, United States

**Andrew A. Maudsley, PhD**

Department of Radiology, Miller School of Medicine, University of Miami, 1600 NW 10th Ave #1140, Miami, FL 33136, United States

**Jarred W. Younger, PhD (corresponding author)**

Department of Psychology, The University of Alabama at Birmingham, 1720 2nd Ave S, Birmingham, AL 35294, United States

younger@uab.edu

P: (205) 975-5821

| <b>ID</b> | <b>Age</b> | <b>Medications</b>                                                                                                                                                 | <b>Comorbid Medical/Psychiatric Conditions</b>                    |
|-----------|------------|--------------------------------------------------------------------------------------------------------------------------------------------------------------------|-------------------------------------------------------------------|
| 1         | 45         | duloxetine, gabapentin, levothyroxine, insulin, Vitamin D, Vitamin B12, botulinum toxin injections (migraines)                                                     | Type I DM (controlled), hypothyroidism (controlled), fibromyalgia |
| 2         | 38         | sertraline, zolpidem, esomeprazole, Mibelas (ethinyl estradiol, norethindrone acetate, ferrous fumarate)                                                           | anxiety, IBS, TMJ, acid reflux                                    |
| 3         | 43         | Alyacen (ethinyl estradiol, norethindrone), montelukast, omeprazole, sertraline, antihistamines, trazodone, loperamide, Vitamin B                                  | allergies, asthma, anxiety, acid reflux                           |
| 4         | 53         | sertraline, trazodone, ibuprofen PRN                                                                                                                               | depression                                                        |
| 5         | 42         | Vimovo (esomeprazole, naproxen) - did not take in am of scan; duloxetine, clonazepam, Vitamin D, iron                                                              | none                                                              |
| 6         | 40         | Nature-throid (levothyroxine, liothyronine), meloxicam PRN, flecainide PRN, sumatriptan PRN, sertraline, lorazepam, rosuvastatin, trazodone, melatonin, famotidine | hypothyroidism (controlled), OSA (CPAP-compliant)                 |
| 7         | 26         | acetaminophen PRN                                                                                                                                                  | none                                                              |
| 8         | 47         | duloxetine                                                                                                                                                         | anxiety                                                           |
| 9         | 55         | statins, antihypertensives, thyroid, multivitamin                                                                                                                  | HTN, hypercholesterolemia, hypothyroidism (controlled)            |
| 10        | 37         | none                                                                                                                                                               | none                                                              |
| 11        | 34         | vortioxetine                                                                                                                                                       | none                                                              |
| 12        | 32         | topiramate, citalopram, pantoprazole, trazodone                                                                                                                    | asthma, GERD, migraines                                           |
| 13        | 51         | duloxetine, bupropion, fluticasone (corticosteroid), montelukast, methocarbamol, lorazepam PRN, lidocaine                                                          | fibromyalgia                                                      |
| 14        | 29         | cetirizine, montelukast                                                                                                                                            | none                                                              |
| 15        | 32         | multivitamin                                                                                                                                                       | none                                                              |

Comorbid medical/psychiatric conditions and medications in the ME/CFS group.
