# Supplementary material
Source: PubMed Central journal article supplement (PMC6612467)
Supplement: NIHMS1518146-supplement-11682_2018_29_MOESM2_ESM.pdf [file NIHMS1518146-supplement-11682_2018_29_MOESM2_ESM.pdf]

**Evidence of widespread metabolite abnormalities in Myalgic Encephalomyelitis/Chronic Fatigue Syndrome: Assessment with whole-brain Magnetic Resonance Spectroscopy.**

**Brain Imaging and Behavior**

**Christina Mueller, MS**

Department of Psychology, The University of Alabama at Birmingham, 1720 2nd Ave S, Birmingham, AL 35294, United States

**Joanne C. Lin, PhD**

Department of Psychology, The University of Alabama at Birmingham, 1720 2nd Ave S, Birmingham, AL 35294, United States

**Sulaiman Sheriff**

Department of Radiology, Miller School of Medicine, University of Miami, 1600 NW 10th Ave #1140, Miami, FL 33136, United States

**Andrew A. Maudsley, PhD**

Department of Radiology, Miller School of Medicine, University of Miami, 1600 NW 10th Ave #1140, Miami, FL 33136, United States

**Jarred W. Younger, PhD (corresponding author)**

Department of Psychology, The University of Alabama at Birmingham, 1720 2nd Ave S, Birmingham, AL 35294, United States

younger@uab.edu

P: (205) 975-5821

| <b>ROI</b>                | <b>Group</b> | <b>n</b> | <b>Mean</b> | <b>SD</b> | <b>t</b> | <b>df</b> | <b>p</b> |                           |        |    |       |       |        |    |       |          |    |       |       |                           |        |    |       |       |        |    |       |          |    |       |       |                           |        |    |       |       |        |    |       |          |    |       |       |                           |        |    |       |       |        |    |       |          |    |       |       |                           |        |    |       |       |        |    |       |          |    |       |       |                           |        |    |       |       |        |    |       |          |    |       |       |                           |        |    |       |       |        |    |       |          |    |       |       |                      |        |    |       |       |        |    |       |          |    |       |       |                      |        |    |       |       |        |    |       |          |    |       |       |                      |        |    |       |       |        |    |       |          |    |       |       |                      |        |    |       |       |        |    |       |          |    |       |       |                      |        |    |       |       |        |    |       |          |    |       |       |                      |        |    |       |       |        |    |       |          |    |       |       |                      |        |    |       |       |       |    |       |          |    |       |       |                      |        |    |       |       |       |    |       |          |    |       |       |               |        |    |       |       |       |    |       |          |    |       |       |               |        |    |       |       |       |    |       |          |    |       |       |             |        |    |       |       |       |    |       |          |    |       |       |             |        |    |       |       |       |    |       |
|---------------------------|--------------|----------|-------------|-----------|----------|-----------|----------|---------------------------|--------|----|-------|-------|--------|----|-------|----------|----|-------|-------|---------------------------|--------|----|-------|-------|--------|----|-------|----------|----|-------|-------|---------------------------|--------|----|-------|-------|--------|----|-------|----------|----|-------|-------|---------------------------|--------|----|-------|-------|--------|----|-------|----------|----|-------|-------|---------------------------|--------|----|-------|-------|--------|----|-------|----------|----|-------|-------|---------------------------|--------|----|-------|-------|--------|----|-------|----------|----|-------|-------|---------------------------|--------|----|-------|-------|--------|----|-------|----------|----|-------|-------|----------------------|--------|----|-------|-------|--------|----|-------|----------|----|-------|-------|----------------------|--------|----|-------|-------|--------|----|-------|----------|----|-------|-------|----------------------|--------|----|-------|-------|--------|----|-------|----------|----|-------|-------|----------------------|--------|----|-------|-------|--------|----|-------|----------|----|-------|-------|----------------------|--------|----|-------|-------|--------|----|-------|----------|----|-------|-------|----------------------|--------|----|-------|-------|--------|----|-------|----------|----|-------|-------|----------------------|--------|----|-------|-------|-------|----|-------|----------|----|-------|-------|----------------------|--------|----|-------|-------|-------|----|-------|----------|----|-------|-------|---------------|--------|----|-------|-------|-------|----|-------|----------|----|-------|-------|---------------|--------|----|-------|-------|-------|----|-------|----------|----|-------|-------|-------------|--------|----|-------|-------|-------|----|-------|----------|----|-------|-------|-------------|--------|----|-------|-------|-------|----|-------|
| R Precentral Gyrus        | ME/CFS       | 15       | 6.000       | 0.741     | -1.880   | 28        | 0.071    |                           |        |    |       |       |        |    |       |          |    |       |       |                           |        |    |       |       |        |    |       |          |    |       |       |                           |        |    |       |       |        |    |       |          |    |       |       |                           |        |    |       |       |        |    |       |          |    |       |       |                           |        |    |       |       |        |    |       |          |    |       |       |                           |        |    |       |       |        |    |       |          |    |       |       |                           |        |    |       |       |        |    |       |          |    |       |       |                      |        |    |       |       |        |    |       |          |    |       |       |                      |        |    |       |       |        |    |       |          |    |       |       |                      |        |    |       |       |        |    |       |          |    |       |       |                      |        |    |       |       |        |    |       |          |    |       |       |                      |        |    |       |       |        |    |       |          |    |       |       |                      |        |    |       |       |        |    |       |          |    |       |       |                      |        |    |       |       |       |    |       |          |    |       |       |                      |        |    |       |       |       |    |       |          |    |       |       |               |        |    |       |       |       |    |       |          |    |       |       |               |        |    |       |       |       |    |       |          |    |       |       |             |        |    |       |       |       |    |       |          |    |       |       |             |        |    |       |       |       |    |       |
|                           | Controls     | 15       | 6.656       | 1.131     |          |           |          | L Precentral Gyrus        | ME/CFS | 15 | 6.355 | 1.130 | -0.548 | 28 | 0.588 | Controls | 15 | 6.555 | 0.854 | R Frontal Lobe            | ME/CFS | 15 | 5.747 | 0.612 | -1.858 | 28 | 0.074 | Controls | 15 | 6.369 | 1.142 | L Frontal Lobe            | ME/CFS | 15 | 6.035 | 0.717 | -1.469 | 28 | 0.153 | Controls | 15 | 6.440 | 0.793 | R Rolandic Operculum      | ME/CFS | 15 | 6.235 | 0.808 | -1.247 | 28 | 0.223 | Controls | 15 | 6.592 | 0.760 | L Rolandic Operculum      | ME/CFS | 15 | 6.815 | 1.161 | 1.054  | 28 | 0.301 | Controls | 15 | 6.465 | 0.551 | R Supplemental Motor Area | ME/CFS | 15 | 5.634 | 0.843 | -0.430 | 28 | 0.671 | Controls | 15 | 5.772 | 0.914 | L Supplemental Motor Area | ME/CFS | 15 | 5.777 | 0.959 | -0.225 | 28 | 0.824 | Controls | 15 | 5.850 | 0.807 | R Insula             | ME/CFS | 15 | 5.938 | 0.576 | -1.633 | 28 | 0.114 | Controls | 15 | 6.338 | 0.755 | L Insula             | ME/CFS | 15 | 6.675 | 0.797 | 1.723  | 28 | 0.096 | Controls | 15 | 6.273 | 0.426 | R Anterior Cingulum  | ME/CFS | 15 | 6.852 | 1.495 | 1.487  | 28 | 0.148 | Controls | 15 | 6.079 | 1.350 | L Anterior Cingulum  | ME/CFS | 15 | 6.740 | 1.174 | 0.797  | 28 | 0.432 | Controls | 15 | 6.405 | 1.125 | R Mid Cingulum       | ME/CFS | 15 | 6.243 | 0.667 | -0.422 | 28 | 0.676 | Controls | 15 | 6.348 | 0.695 | L Mid Cingulum       | ME/CFS | 15 | 6.140 | 0.691 | -0.667 | 28 | 0.510 | Controls | 15 | 6.300 | 0.620 | R Posterior Cingulum | ME/CFS | 15 | 5.505 | 0.572 | 0.136 | 28 | 0.893 | Controls | 15 | 5.476 | 0.608 | L Posterior Cingulum | ME/CFS | 15 | 5.006 | 0.688 | 0.313 | 28 | 0.757 | Controls | 15 | 4.932 | 0.604 | R Hippocampus | ME/CFS | 15 | 4.500 | 0.656 | 0.253 | 28 | 0.802 | Controls | 15 | 4.436 | 0.734 | L Hippocampus | ME/CFS | 15 | 5.054 | 0.869 | 0.286 | 28 | 0.777 | Controls | 15 | 4.976 | 0.586 | R Calcarine | ME/CFS | 15 | 7.842 | 1.305 | 1.201 | 28 | 0.240 | Controls | 15 | 7.340 | 0.957 | L Calcarine | ME/CFS | 15 | 7.472 | 1.305 | 0.527 | 28 | 0.602 |
| L Precentral Gyrus        | ME/CFS       | 15       | 6.355       | 1.130     | -0.548   | 28        | 0.588    |                           |        |    |       |       |        |    |       |          |    |       |       |                           |        |    |       |       |        |    |       |          |    |       |       |                           |        |    |       |       |        |    |       |          |    |       |       |                           |        |    |       |       |        |    |       |          |    |       |       |                           |        |    |       |       |        |    |       |          |    |       |       |                           |        |    |       |       |        |    |       |          |    |       |       |                           |        |    |       |       |        |    |       |          |    |       |       |                      |        |    |       |       |        |    |       |          |    |       |       |                      |        |    |       |       |        |    |       |          |    |       |       |                      |        |    |       |       |        |    |       |          |    |       |       |                      |        |    |       |       |        |    |       |          |    |       |       |                      |        |    |       |       |        |    |       |          |    |       |       |                      |        |    |       |       |        |    |       |          |    |       |       |                      |        |    |       |       |       |    |       |          |    |       |       |                      |        |    |       |       |       |    |       |          |    |       |       |               |        |    |       |       |       |    |       |          |    |       |       |               |        |    |       |       |       |    |       |          |    |       |       |             |        |    |       |       |       |    |       |          |    |       |       |             |        |    |       |       |       |    |       |
|                           | Controls     | 15       | 6.555       | 0.854     |          |           |          | R Frontal Lobe            | ME/CFS | 15 | 5.747 | 0.612 | -1.858 | 28 | 0.074 | Controls | 15 | 6.369 | 1.142 | L Frontal Lobe            | ME/CFS | 15 | 6.035 | 0.717 | -1.469 | 28 | 0.153 | Controls | 15 | 6.440 | 0.793 | R Rolandic Operculum      | ME/CFS | 15 | 6.235 | 0.808 | -1.247 | 28 | 0.223 | Controls | 15 | 6.592 | 0.760 | L Rolandic Operculum      | ME/CFS | 15 | 6.815 | 1.161 | 1.054  | 28 | 0.301 | Controls | 15 | 6.465 | 0.551 | R Supplemental Motor Area | ME/CFS | 15 | 5.634 | 0.843 | -0.430 | 28 | 0.671 | Controls | 15 | 5.772 | 0.914 | L Supplemental Motor Area | ME/CFS | 15 | 5.777 | 0.959 | -0.225 | 28 | 0.824 | Controls | 15 | 5.850 | 0.807 | R Insula                  | ME/CFS | 15 | 5.938 | 0.576 | -1.633 | 28 | 0.114 | Controls | 15 | 6.338 | 0.755 | L Insula             | ME/CFS | 15 | 6.675 | 0.797 | 1.723  | 28 | 0.096 | Controls | 15 | 6.273 | 0.426 | R Anterior Cingulum  | ME/CFS | 15 | 6.852 | 1.495 | 1.487  | 28 | 0.148 | Controls | 15 | 6.079 | 1.350 | L Anterior Cingulum  | ME/CFS | 15 | 6.740 | 1.174 | 0.797  | 28 | 0.432 | Controls | 15 | 6.405 | 1.125 | R Mid Cingulum       | ME/CFS | 15 | 6.243 | 0.667 | -0.422 | 28 | 0.676 | Controls | 15 | 6.348 | 0.695 | L Mid Cingulum       | ME/CFS | 15 | 6.140 | 0.691 | -0.667 | 28 | 0.510 | Controls | 15 | 6.300 | 0.620 | R Posterior Cingulum | ME/CFS | 15 | 5.505 | 0.572 | 0.136  | 28 | 0.893 | Controls | 15 | 5.476 | 0.608 | L Posterior Cingulum | ME/CFS | 15 | 5.006 | 0.688 | 0.313 | 28 | 0.757 | Controls | 15 | 4.932 | 0.604 | R Hippocampus        | ME/CFS | 15 | 4.500 | 0.656 | 0.253 | 28 | 0.802 | Controls | 15 | 4.436 | 0.734 | L Hippocampus | ME/CFS | 15 | 5.054 | 0.869 | 0.286 | 28 | 0.777 | Controls | 15 | 4.976 | 0.586 | R Calcarine   | ME/CFS | 15 | 7.842 | 1.305 | 1.201 | 28 | 0.240 | Controls | 15 | 7.340 | 0.957 | L Calcarine | ME/CFS | 15 | 7.472 | 1.305 | 0.527 | 28 | 0.602 | Controls | 15 | 7.254 | 0.916 |             |        |    |       |       |       |    |       |
| R Frontal Lobe            | ME/CFS       | 15       | 5.747       | 0.612     | -1.858   | 28        | 0.074    |                           |        |    |       |       |        |    |       |          |    |       |       |                           |        |    |       |       |        |    |       |          |    |       |       |                           |        |    |       |       |        |    |       |          |    |       |       |                           |        |    |       |       |        |    |       |          |    |       |       |                           |        |    |       |       |        |    |       |          |    |       |       |                           |        |    |       |       |        |    |       |          |    |       |       |                           |        |    |       |       |        |    |       |          |    |       |       |                      |        |    |       |       |        |    |       |          |    |       |       |                      |        |    |       |       |        |    |       |          |    |       |       |                      |        |    |       |       |        |    |       |          |    |       |       |                      |        |    |       |       |        |    |       |          |    |       |       |                      |        |    |       |       |        |    |       |          |    |       |       |                      |        |    |       |       |        |    |       |          |    |       |       |                      |        |    |       |       |       |    |       |          |    |       |       |                      |        |    |       |       |       |    |       |          |    |       |       |               |        |    |       |       |       |    |       |          |    |       |       |               |        |    |       |       |       |    |       |          |    |       |       |             |        |    |       |       |       |    |       |          |    |       |       |             |        |    |       |       |       |    |       |
|                           | Controls     | 15       | 6.369       | 1.142     |          |           |          | L Frontal Lobe            | ME/CFS | 15 | 6.035 | 0.717 | -1.469 | 28 | 0.153 | Controls | 15 | 6.440 | 0.793 | R Rolandic Operculum      | ME/CFS | 15 | 6.235 | 0.808 | -1.247 | 28 | 0.223 | Controls | 15 | 6.592 | 0.760 | L Rolandic Operculum      | ME/CFS | 15 | 6.815 | 1.161 | 1.054  | 28 | 0.301 | Controls | 15 | 6.465 | 0.551 | R Supplemental Motor Area | ME/CFS | 15 | 5.634 | 0.843 | -0.430 | 28 | 0.671 | Controls | 15 | 5.772 | 0.914 | L Supplemental Motor Area | ME/CFS | 15 | 5.777 | 0.959 | -0.225 | 28 | 0.824 | Controls | 15 | 5.850 | 0.807 | R Insula                  | ME/CFS | 15 | 5.938 | 0.576 | -1.633 | 28 | 0.114 | Controls | 15 | 6.338 | 0.755 | L Insula                  | ME/CFS | 15 | 6.675 | 0.797 | 1.723  | 28 | 0.096 | Controls | 15 | 6.273 | 0.426 | R Anterior Cingulum  | ME/CFS | 15 | 6.852 | 1.495 | 1.487  | 28 | 0.148 | Controls | 15 | 6.079 | 1.350 | L Anterior Cingulum  | ME/CFS | 15 | 6.740 | 1.174 | 0.797  | 28 | 0.432 | Controls | 15 | 6.405 | 1.125 | R Mid Cingulum       | ME/CFS | 15 | 6.243 | 0.667 | -0.422 | 28 | 0.676 | Controls | 15 | 6.348 | 0.695 | L Mid Cingulum       | ME/CFS | 15 | 6.140 | 0.691 | -0.667 | 28 | 0.510 | Controls | 15 | 6.300 | 0.620 | R Posterior Cingulum | ME/CFS | 15 | 5.505 | 0.572 | 0.136  | 28 | 0.893 | Controls | 15 | 5.476 | 0.608 | L Posterior Cingulum | ME/CFS | 15 | 5.006 | 0.688 | 0.313  | 28 | 0.757 | Controls | 15 | 4.932 | 0.604 | R Hippocampus        | ME/CFS | 15 | 4.500 | 0.656 | 0.253 | 28 | 0.802 | Controls | 15 | 4.436 | 0.734 | L Hippocampus        | ME/CFS | 15 | 5.054 | 0.869 | 0.286 | 28 | 0.777 | Controls | 15 | 4.976 | 0.586 | R Calcarine   | ME/CFS | 15 | 7.842 | 1.305 | 1.201 | 28 | 0.240 | Controls | 15 | 7.340 | 0.957 | L Calcarine   | ME/CFS | 15 | 7.472 | 1.305 | 0.527 | 28 | 0.602 | Controls | 15 | 7.254 | 0.916 |             |        |    |       |       |       |    |       |          |    |       |       |             |        |    |       |       |       |    |       |
| L Frontal Lobe            | ME/CFS       | 15       | 6.035       | 0.717     | -1.469   | 28        | 0.153    |                           |        |    |       |       |        |    |       |          |    |       |       |                           |        |    |       |       |        |    |       |          |    |       |       |                           |        |    |       |       |        |    |       |          |    |       |       |                           |        |    |       |       |        |    |       |          |    |       |       |                           |        |    |       |       |        |    |       |          |    |       |       |                           |        |    |       |       |        |    |       |          |    |       |       |                           |        |    |       |       |        |    |       |          |    |       |       |                      |        |    |       |       |        |    |       |          |    |       |       |                      |        |    |       |       |        |    |       |          |    |       |       |                      |        |    |       |       |        |    |       |          |    |       |       |                      |        |    |       |       |        |    |       |          |    |       |       |                      |        |    |       |       |        |    |       |          |    |       |       |                      |        |    |       |       |        |    |       |          |    |       |       |                      |        |    |       |       |       |    |       |          |    |       |       |                      |        |    |       |       |       |    |       |          |    |       |       |               |        |    |       |       |       |    |       |          |    |       |       |               |        |    |       |       |       |    |       |          |    |       |       |             |        |    |       |       |       |    |       |          |    |       |       |             |        |    |       |       |       |    |       |
|                           | Controls     | 15       | 6.440       | 0.793     |          |           |          | R Rolandic Operculum      | ME/CFS | 15 | 6.235 | 0.808 | -1.247 | 28 | 0.223 | Controls | 15 | 6.592 | 0.760 | L Rolandic Operculum      | ME/CFS | 15 | 6.815 | 1.161 | 1.054  | 28 | 0.301 | Controls | 15 | 6.465 | 0.551 | R Supplemental Motor Area | ME/CFS | 15 | 5.634 | 0.843 | -0.430 | 28 | 0.671 | Controls | 15 | 5.772 | 0.914 | L Supplemental Motor Area | ME/CFS | 15 | 5.777 | 0.959 | -0.225 | 28 | 0.824 | Controls | 15 | 5.850 | 0.807 | R Insula                  | ME/CFS | 15 | 5.938 | 0.576 | -1.633 | 28 | 0.114 | Controls | 15 | 6.338 | 0.755 | L Insula                  | ME/CFS | 15 | 6.675 | 0.797 | 1.723  | 28 | 0.096 | Controls | 15 | 6.273 | 0.426 | R Anterior Cingulum       | ME/CFS | 15 | 6.852 | 1.495 | 1.487  | 28 | 0.148 | Controls | 15 | 6.079 | 1.350 | L Anterior Cingulum  | ME/CFS | 15 | 6.740 | 1.174 | 0.797  | 28 | 0.432 | Controls | 15 | 6.405 | 1.125 | R Mid Cingulum       | ME/CFS | 15 | 6.243 | 0.667 | -0.422 | 28 | 0.676 | Controls | 15 | 6.348 | 0.695 | L Mid Cingulum       | ME/CFS | 15 | 6.140 | 0.691 | -0.667 | 28 | 0.510 | Controls | 15 | 6.300 | 0.620 | R Posterior Cingulum | ME/CFS | 15 | 5.505 | 0.572 | 0.136  | 28 | 0.893 | Controls | 15 | 5.476 | 0.608 | L Posterior Cingulum | ME/CFS | 15 | 5.006 | 0.688 | 0.313  | 28 | 0.757 | Controls | 15 | 4.932 | 0.604 | R Hippocampus        | ME/CFS | 15 | 4.500 | 0.656 | 0.253  | 28 | 0.802 | Controls | 15 | 4.436 | 0.734 | L Hippocampus        | ME/CFS | 15 | 5.054 | 0.869 | 0.286 | 28 | 0.777 | Controls | 15 | 4.976 | 0.586 | R Calcarine          | ME/CFS | 15 | 7.842 | 1.305 | 1.201 | 28 | 0.240 | Controls | 15 | 7.340 | 0.957 | L Calcarine   | ME/CFS | 15 | 7.472 | 1.305 | 0.527 | 28 | 0.602 | Controls | 15 | 7.254 | 0.916 |               |        |    |       |       |       |    |       |          |    |       |       |             |        |    |       |       |       |    |       |          |    |       |       |             |        |    |       |       |       |    |       |
| R Rolandic Operculum      | ME/CFS       | 15       | 6.235       | 0.808     | -1.247   | 28        | 0.223    |                           |        |    |       |       |        |    |       |          |    |       |       |                           |        |    |       |       |        |    |       |          |    |       |       |                           |        |    |       |       |        |    |       |          |    |       |       |                           |        |    |       |       |        |    |       |          |    |       |       |                           |        |    |       |       |        |    |       |          |    |       |       |                           |        |    |       |       |        |    |       |          |    |       |       |                           |        |    |       |       |        |    |       |          |    |       |       |                      |        |    |       |       |        |    |       |          |    |       |       |                      |        |    |       |       |        |    |       |          |    |       |       |                      |        |    |       |       |        |    |       |          |    |       |       |                      |        |    |       |       |        |    |       |          |    |       |       |                      |        |    |       |       |        |    |       |          |    |       |       |                      |        |    |       |       |        |    |       |          |    |       |       |                      |        |    |       |       |       |    |       |          |    |       |       |                      |        |    |       |       |       |    |       |          |    |       |       |               |        |    |       |       |       |    |       |          |    |       |       |               |        |    |       |       |       |    |       |          |    |       |       |             |        |    |       |       |       |    |       |          |    |       |       |             |        |    |       |       |       |    |       |
|                           | Controls     | 15       | 6.592       | 0.760     |          |           |          | L Rolandic Operculum      | ME/CFS | 15 | 6.815 | 1.161 | 1.054  | 28 | 0.301 | Controls | 15 | 6.465 | 0.551 | R Supplemental Motor Area | ME/CFS | 15 | 5.634 | 0.843 | -0.430 | 28 | 0.671 | Controls | 15 | 5.772 | 0.914 | L Supplemental Motor Area | ME/CFS | 15 | 5.777 | 0.959 | -0.225 | 28 | 0.824 | Controls | 15 | 5.850 | 0.807 | R Insula                  | ME/CFS | 15 | 5.938 | 0.576 | -1.633 | 28 | 0.114 | Controls | 15 | 6.338 | 0.755 | L Insula                  | ME/CFS | 15 | 6.675 | 0.797 | 1.723  | 28 | 0.096 | Controls | 15 | 6.273 | 0.426 | R Anterior Cingulum       | ME/CFS | 15 | 6.852 | 1.495 | 1.487  | 28 | 0.148 | Controls | 15 | 6.079 | 1.350 | L Anterior Cingulum       | ME/CFS | 15 | 6.740 | 1.174 | 0.797  | 28 | 0.432 | Controls | 15 | 6.405 | 1.125 | R Mid Cingulum       | ME/CFS | 15 | 6.243 | 0.667 | -0.422 | 28 | 0.676 | Controls | 15 | 6.348 | 0.695 | L Mid Cingulum       | ME/CFS | 15 | 6.140 | 0.691 | -0.667 | 28 | 0.510 | Controls | 15 | 6.300 | 0.620 | R Posterior Cingulum | ME/CFS | 15 | 5.505 | 0.572 | 0.136  | 28 | 0.893 | Controls | 15 | 5.476 | 0.608 | L Posterior Cingulum | ME/CFS | 15 | 5.006 | 0.688 | 0.313  | 28 | 0.757 | Controls | 15 | 4.932 | 0.604 | R Hippocampus        | ME/CFS | 15 | 4.500 | 0.656 | 0.253  | 28 | 0.802 | Controls | 15 | 4.436 | 0.734 | L Hippocampus        | ME/CFS | 15 | 5.054 | 0.869 | 0.286  | 28 | 0.777 | Controls | 15 | 4.976 | 0.586 | R Calcarine          | ME/CFS | 15 | 7.842 | 1.305 | 1.201 | 28 | 0.240 | Controls | 15 | 7.340 | 0.957 | L Calcarine          | ME/CFS | 15 | 7.472 | 1.305 | 0.527 | 28 | 0.602 | Controls | 15 | 7.254 | 0.916 |               |        |    |       |       |       |    |       |          |    |       |       |               |        |    |       |       |       |    |       |          |    |       |       |             |        |    |       |       |       |    |       |          |    |       |       |             |        |    |       |       |       |    |       |
| L Rolandic Operculum      | ME/CFS       | 15       | 6.815       | 1.161     | 1.054    | 28        | 0.301    |                           |        |    |       |       |        |    |       |          |    |       |       |                           |        |    |       |       |        |    |       |          |    |       |       |                           |        |    |       |       |        |    |       |          |    |       |       |                           |        |    |       |       |        |    |       |          |    |       |       |                           |        |    |       |       |        |    |       |          |    |       |       |                           |        |    |       |       |        |    |       |          |    |       |       |                           |        |    |       |       |        |    |       |          |    |       |       |                      |        |    |       |       |        |    |       |          |    |       |       |                      |        |    |       |       |        |    |       |          |    |       |       |                      |        |    |       |       |        |    |       |          |    |       |       |                      |        |    |       |       |        |    |       |          |    |       |       |                      |        |    |       |       |        |    |       |          |    |       |       |                      |        |    |       |       |        |    |       |          |    |       |       |                      |        |    |       |       |       |    |       |          |    |       |       |                      |        |    |       |       |       |    |       |          |    |       |       |               |        |    |       |       |       |    |       |          |    |       |       |               |        |    |       |       |       |    |       |          |    |       |       |             |        |    |       |       |       |    |       |          |    |       |       |             |        |    |       |       |       |    |       |
|                           | Controls     | 15       | 6.465       | 0.551     |          |           |          | R Supplemental Motor Area | ME/CFS | 15 | 5.634 | 0.843 | -0.430 | 28 | 0.671 | Controls | 15 | 5.772 | 0.914 | L Supplemental Motor Area | ME/CFS | 15 | 5.777 | 0.959 | -0.225 | 28 | 0.824 | Controls | 15 | 5.850 | 0.807 | R Insula                  | ME/CFS | 15 | 5.938 | 0.576 | -1.633 | 28 | 0.114 | Controls | 15 | 6.338 | 0.755 | L Insula                  | ME/CFS | 15 | 6.675 | 0.797 | 1.723  | 28 | 0.096 | Controls | 15 | 6.273 | 0.426 | R Anterior Cingulum       | ME/CFS | 15 | 6.852 | 1.495 | 1.487  | 28 | 0.148 | Controls | 15 | 6.079 | 1.350 | L Anterior Cingulum       | ME/CFS | 15 | 6.740 | 1.174 | 0.797  | 28 | 0.432 | Controls | 15 | 6.405 | 1.125 | R Mid Cingulum            | ME/CFS | 15 | 6.243 | 0.667 | -0.422 | 28 | 0.676 | Controls | 15 | 6.348 | 0.695 | L Mid Cingulum       | ME/CFS | 15 | 6.140 | 0.691 | -0.667 | 28 | 0.510 | Controls | 15 | 6.300 | 0.620 | R Posterior Cingulum | ME/CFS | 15 | 5.505 | 0.572 | 0.136  | 28 | 0.893 | Controls | 15 | 5.476 | 0.608 | L Posterior Cingulum | ME/CFS | 15 | 5.006 | 0.688 | 0.313  | 28 | 0.757 | Controls | 15 | 4.932 | 0.604 | R Hippocampus        | ME/CFS | 15 | 4.500 | 0.656 | 0.253  | 28 | 0.802 | Controls | 15 | 4.436 | 0.734 | L Hippocampus        | ME/CFS | 15 | 5.054 | 0.869 | 0.286  | 28 | 0.777 | Controls | 15 | 4.976 | 0.586 | R Calcarine          | ME/CFS | 15 | 7.842 | 1.305 | 1.201  | 28 | 0.240 | Controls | 15 | 7.340 | 0.957 | L Calcarine          | ME/CFS | 15 | 7.472 | 1.305 | 0.527 | 28 | 0.602 | Controls | 15 | 7.254 | 0.916 |                      |        |    |       |       |       |    |       |          |    |       |       |               |        |    |       |       |       |    |       |          |    |       |       |               |        |    |       |       |       |    |       |          |    |       |       |             |        |    |       |       |       |    |       |          |    |       |       |             |        |    |       |       |       |    |       |
| R Supplemental Motor Area | ME/CFS       | 15       | 5.634       | 0.843     | -0.430   | 28        | 0.671    |                           |        |    |       |       |        |    |       |          |    |       |       |                           |        |    |       |       |        |    |       |          |    |       |       |                           |        |    |       |       |        |    |       |          |    |       |       |                           |        |    |       |       |        |    |       |          |    |       |       |                           |        |    |       |       |        |    |       |          |    |       |       |                           |        |    |       |       |        |    |       |          |    |       |       |                           |        |    |       |       |        |    |       |          |    |       |       |                      |        |    |       |       |        |    |       |          |    |       |       |                      |        |    |       |       |        |    |       |          |    |       |       |                      |        |    |       |       |        |    |       |          |    |       |       |                      |        |    |       |       |        |    |       |          |    |       |       |                      |        |    |       |       |        |    |       |          |    |       |       |                      |        |    |       |       |        |    |       |          |    |       |       |                      |        |    |       |       |       |    |       |          |    |       |       |                      |        |    |       |       |       |    |       |          |    |       |       |               |        |    |       |       |       |    |       |          |    |       |       |               |        |    |       |       |       |    |       |          |    |       |       |             |        |    |       |       |       |    |       |          |    |       |       |             |        |    |       |       |       |    |       |
|                           | Controls     | 15       | 5.772       | 0.914     |          |           |          | L Supplemental Motor Area | ME/CFS | 15 | 5.777 | 0.959 | -0.225 | 28 | 0.824 | Controls | 15 | 5.850 | 0.807 | R Insula                  | ME/CFS | 15 | 5.938 | 0.576 | -1.633 | 28 | 0.114 | Controls | 15 | 6.338 | 0.755 | L Insula                  | ME/CFS | 15 | 6.675 | 0.797 | 1.723  | 28 | 0.096 | Controls | 15 | 6.273 | 0.426 | R Anterior Cingulum       | ME/CFS | 15 | 6.852 | 1.495 | 1.487  | 28 | 0.148 | Controls | 15 | 6.079 | 1.350 | L Anterior Cingulum       | ME/CFS | 15 | 6.740 | 1.174 | 0.797  | 28 | 0.432 | Controls | 15 | 6.405 | 1.125 | R Mid Cingulum            | ME/CFS | 15 | 6.243 | 0.667 | -0.422 | 28 | 0.676 | Controls | 15 | 6.348 | 0.695 | L Mid Cingulum            | ME/CFS | 15 | 6.140 | 0.691 | -0.667 | 28 | 0.510 | Controls | 15 | 6.300 | 0.620 | R Posterior Cingulum | ME/CFS | 15 | 5.505 | 0.572 | 0.136  | 28 | 0.893 | Controls | 15 | 5.476 | 0.608 | L Posterior Cingulum | ME/CFS | 15 | 5.006 | 0.688 | 0.313  | 28 | 0.757 | Controls | 15 | 4.932 | 0.604 | R Hippocampus        | ME/CFS | 15 | 4.500 | 0.656 | 0.253  | 28 | 0.802 | Controls | 15 | 4.436 | 0.734 | L Hippocampus        | ME/CFS | 15 | 5.054 | 0.869 | 0.286  | 28 | 0.777 | Controls | 15 | 4.976 | 0.586 | R Calcarine          | ME/CFS | 15 | 7.842 | 1.305 | 1.201  | 28 | 0.240 | Controls | 15 | 7.340 | 0.957 | L Calcarine          | ME/CFS | 15 | 7.472 | 1.305 | 0.527  | 28 | 0.602 | Controls | 15 | 7.254 | 0.916 |                      |        |    |       |       |       |    |       |          |    |       |       |                      |        |    |       |       |       |    |       |          |    |       |       |               |        |    |       |       |       |    |       |          |    |       |       |               |        |    |       |       |       |    |       |          |    |       |       |             |        |    |       |       |       |    |       |          |    |       |       |             |        |    |       |       |       |    |       |
| L Supplemental Motor Area | ME/CFS       | 15       | 5.777       | 0.959     | -0.225   | 28        | 0.824    |                           |        |    |       |       |        |    |       |          |    |       |       |                           |        |    |       |       |        |    |       |          |    |       |       |                           |        |    |       |       |        |    |       |          |    |       |       |                           |        |    |       |       |        |    |       |          |    |       |       |                           |        |    |       |       |        |    |       |          |    |       |       |                           |        |    |       |       |        |    |       |          |    |       |       |                           |        |    |       |       |        |    |       |          |    |       |       |                      |        |    |       |       |        |    |       |          |    |       |       |                      |        |    |       |       |        |    |       |          |    |       |       |                      |        |    |       |       |        |    |       |          |    |       |       |                      |        |    |       |       |        |    |       |          |    |       |       |                      |        |    |       |       |        |    |       |          |    |       |       |                      |        |    |       |       |        |    |       |          |    |       |       |                      |        |    |       |       |       |    |       |          |    |       |       |                      |        |    |       |       |       |    |       |          |    |       |       |               |        |    |       |       |       |    |       |          |    |       |       |               |        |    |       |       |       |    |       |          |    |       |       |             |        |    |       |       |       |    |       |          |    |       |       |             |        |    |       |       |       |    |       |
|                           | Controls     | 15       | 5.850       | 0.807     |          |           |          | R Insula                  | ME/CFS | 15 | 5.938 | 0.576 | -1.633 | 28 | 0.114 | Controls | 15 | 6.338 | 0.755 | L Insula                  | ME/CFS | 15 | 6.675 | 0.797 | 1.723  | 28 | 0.096 | Controls | 15 | 6.273 | 0.426 | R Anterior Cingulum       | ME/CFS | 15 | 6.852 | 1.495 | 1.487  | 28 | 0.148 | Controls | 15 | 6.079 | 1.350 | L Anterior Cingulum       | ME/CFS | 15 | 6.740 | 1.174 | 0.797  | 28 | 0.432 | Controls | 15 | 6.405 | 1.125 | R Mid Cingulum            | ME/CFS | 15 | 6.243 | 0.667 | -0.422 | 28 | 0.676 | Controls | 15 | 6.348 | 0.695 | L Mid Cingulum            | ME/CFS | 15 | 6.140 | 0.691 | -0.667 | 28 | 0.510 | Controls | 15 | 6.300 | 0.620 | R Posterior Cingulum      | ME/CFS | 15 | 5.505 | 0.572 | 0.136  | 28 | 0.893 | Controls | 15 | 5.476 | 0.608 | L Posterior Cingulum | ME/CFS | 15 | 5.006 | 0.688 | 0.313  | 28 | 0.757 | Controls | 15 | 4.932 | 0.604 | R Hippocampus        | ME/CFS | 15 | 4.500 | 0.656 | 0.253  | 28 | 0.802 | Controls | 15 | 4.436 | 0.734 | L Hippocampus        | ME/CFS | 15 | 5.054 | 0.869 | 0.286  | 28 | 0.777 | Controls | 15 | 4.976 | 0.586 | R Calcarine          | ME/CFS | 15 | 7.842 | 1.305 | 1.201  | 28 | 0.240 | Controls | 15 | 7.340 | 0.957 | L Calcarine          | ME/CFS | 15 | 7.472 | 1.305 | 0.527  | 28 | 0.602 | Controls | 15 | 7.254 | 0.916 |                      |        |    |       |       |        |    |       |          |    |       |       |                      |        |    |       |       |       |    |       |          |    |       |       |                      |        |    |       |       |       |    |       |          |    |       |       |               |        |    |       |       |       |    |       |          |    |       |       |               |        |    |       |       |       |    |       |          |    |       |       |             |        |    |       |       |       |    |       |          |    |       |       |             |        |    |       |       |       |    |       |
| R Insula                  | ME/CFS       | 15       | 5.938       | 0.576     | -1.633   | 28        | 0.114    |                           |        |    |       |       |        |    |       |          |    |       |       |                           |        |    |       |       |        |    |       |          |    |       |       |                           |        |    |       |       |        |    |       |          |    |       |       |                           |        |    |       |       |        |    |       |          |    |       |       |                           |        |    |       |       |        |    |       |          |    |       |       |                           |        |    |       |       |        |    |       |          |    |       |       |                           |        |    |       |       |        |    |       |          |    |       |       |                      |        |    |       |       |        |    |       |          |    |       |       |                      |        |    |       |       |        |    |       |          |    |       |       |                      |        |    |       |       |        |    |       |          |    |       |       |                      |        |    |       |       |        |    |       |          |    |       |       |                      |        |    |       |       |        |    |       |          |    |       |       |                      |        |    |       |       |        |    |       |          |    |       |       |                      |        |    |       |       |       |    |       |          |    |       |       |                      |        |    |       |       |       |    |       |          |    |       |       |               |        |    |       |       |       |    |       |          |    |       |       |               |        |    |       |       |       |    |       |          |    |       |       |             |        |    |       |       |       |    |       |          |    |       |       |             |        |    |       |       |       |    |       |
|                           | Controls     | 15       | 6.338       | 0.755     |          |           |          | L Insula                  | ME/CFS | 15 | 6.675 | 0.797 | 1.723  | 28 | 0.096 | Controls | 15 | 6.273 | 0.426 | R Anterior Cingulum       | ME/CFS | 15 | 6.852 | 1.495 | 1.487  | 28 | 0.148 | Controls | 15 | 6.079 | 1.350 | L Anterior Cingulum       | ME/CFS | 15 | 6.740 | 1.174 | 0.797  | 28 | 0.432 | Controls | 15 | 6.405 | 1.125 | R Mid Cingulum            | ME/CFS | 15 | 6.243 | 0.667 | -0.422 | 28 | 0.676 | Controls | 15 | 6.348 | 0.695 | L Mid Cingulum            | ME/CFS | 15 | 6.140 | 0.691 | -0.667 | 28 | 0.510 | Controls | 15 | 6.300 | 0.620 | R Posterior Cingulum      | ME/CFS | 15 | 5.505 | 0.572 | 0.136  | 28 | 0.893 | Controls | 15 | 5.476 | 0.608 | L Posterior Cingulum      | ME/CFS | 15 | 5.006 | 0.688 | 0.313  | 28 | 0.757 | Controls | 15 | 4.932 | 0.604 | R Hippocampus        | ME/CFS | 15 | 4.500 | 0.656 | 0.253  | 28 | 0.802 | Controls | 15 | 4.436 | 0.734 | L Hippocampus        | ME/CFS | 15 | 5.054 | 0.869 | 0.286  | 28 | 0.777 | Controls | 15 | 4.976 | 0.586 | R Calcarine          | ME/CFS | 15 | 7.842 | 1.305 | 1.201  | 28 | 0.240 | Controls | 15 | 7.340 | 0.957 | L Calcarine          | ME/CFS | 15 | 7.472 | 1.305 | 0.527  | 28 | 0.602 | Controls | 15 | 7.254 | 0.916 |                      |        |    |       |       |        |    |       |          |    |       |       |                      |        |    |       |       |        |    |       |          |    |       |       |                      |        |    |       |       |       |    |       |          |    |       |       |                      |        |    |       |       |       |    |       |          |    |       |       |               |        |    |       |       |       |    |       |          |    |       |       |               |        |    |       |       |       |    |       |          |    |       |       |             |        |    |       |       |       |    |       |          |    |       |       |             |        |    |       |       |       |    |       |
| L Insula                  | ME/CFS       | 15       | 6.675       | 0.797     | 1.723    | 28        | 0.096    |                           |        |    |       |       |        |    |       |          |    |       |       |                           |        |    |       |       |        |    |       |          |    |       |       |                           |        |    |       |       |        |    |       |          |    |       |       |                           |        |    |       |       |        |    |       |          |    |       |       |                           |        |    |       |       |        |    |       |          |    |       |       |                           |        |    |       |       |        |    |       |          |    |       |       |                           |        |    |       |       |        |    |       |          |    |       |       |                      |        |    |       |       |        |    |       |          |    |       |       |                      |        |    |       |       |        |    |       |          |    |       |       |                      |        |    |       |       |        |    |       |          |    |       |       |                      |        |    |       |       |        |    |       |          |    |       |       |                      |        |    |       |       |        |    |       |          |    |       |       |                      |        |    |       |       |        |    |       |          |    |       |       |                      |        |    |       |       |       |    |       |          |    |       |       |                      |        |    |       |       |       |    |       |          |    |       |       |               |        |    |       |       |       |    |       |          |    |       |       |               |        |    |       |       |       |    |       |          |    |       |       |             |        |    |       |       |       |    |       |          |    |       |       |             |        |    |       |       |       |    |       |
|                           | Controls     | 15       | 6.273       | 0.426     |          |           |          | R Anterior Cingulum       | ME/CFS | 15 | 6.852 | 1.495 | 1.487  | 28 | 0.148 | Controls | 15 | 6.079 | 1.350 | L Anterior Cingulum       | ME/CFS | 15 | 6.740 | 1.174 | 0.797  | 28 | 0.432 | Controls | 15 | 6.405 | 1.125 | R Mid Cingulum            | ME/CFS | 15 | 6.243 | 0.667 | -0.422 | 28 | 0.676 | Controls | 15 | 6.348 | 0.695 | L Mid Cingulum            | ME/CFS | 15 | 6.140 | 0.691 | -0.667 | 28 | 0.510 | Controls | 15 | 6.300 | 0.620 | R Posterior Cingulum      | ME/CFS | 15 | 5.505 | 0.572 | 0.136  | 28 | 0.893 | Controls | 15 | 5.476 | 0.608 | L Posterior Cingulum      | ME/CFS | 15 | 5.006 | 0.688 | 0.313  | 28 | 0.757 | Controls | 15 | 4.932 | 0.604 | R Hippocampus             | ME/CFS | 15 | 4.500 | 0.656 | 0.253  | 28 | 0.802 | Controls | 15 | 4.436 | 0.734 | L Hippocampus        | ME/CFS | 15 | 5.054 | 0.869 | 0.286  | 28 | 0.777 | Controls | 15 | 4.976 | 0.586 | R Calcarine          | ME/CFS | 15 | 7.842 | 1.305 | 1.201  | 28 | 0.240 | Controls | 15 | 7.340 | 0.957 | L Calcarine          | ME/CFS | 15 | 7.472 | 1.305 | 0.527  | 28 | 0.602 | Controls | 15 | 7.254 | 0.916 |                      |        |    |       |       |        |    |       |          |    |       |       |                      |        |    |       |       |        |    |       |          |    |       |       |                      |        |    |       |       |        |    |       |          |    |       |       |                      |        |    |       |       |       |    |       |          |    |       |       |                      |        |    |       |       |       |    |       |          |    |       |       |               |        |    |       |       |       |    |       |          |    |       |       |               |        |    |       |       |       |    |       |          |    |       |       |             |        |    |       |       |       |    |       |          |    |       |       |             |        |    |       |       |       |    |       |
| R Anterior Cingulum       | ME/CFS       | 15       | 6.852       | 1.495     | 1.487    | 28        | 0.148    |                           |        |    |       |       |        |    |       |          |    |       |       |                           |        |    |       |       |        |    |       |          |    |       |       |                           |        |    |       |       |        |    |       |          |    |       |       |                           |        |    |       |       |        |    |       |          |    |       |       |                           |        |    |       |       |        |    |       |          |    |       |       |                           |        |    |       |       |        |    |       |          |    |       |       |                           |        |    |       |       |        |    |       |          |    |       |       |                      |        |    |       |       |        |    |       |          |    |       |       |                      |        |    |       |       |        |    |       |          |    |       |       |                      |        |    |       |       |        |    |       |          |    |       |       |                      |        |    |       |       |        |    |       |          |    |       |       |                      |        |    |       |       |        |    |       |          |    |       |       |                      |        |    |       |       |        |    |       |          |    |       |       |                      |        |    |       |       |       |    |       |          |    |       |       |                      |        |    |       |       |       |    |       |          |    |       |       |               |        |    |       |       |       |    |       |          |    |       |       |               |        |    |       |       |       |    |       |          |    |       |       |             |        |    |       |       |       |    |       |          |    |       |       |             |        |    |       |       |       |    |       |
|                           | Controls     | 15       | 6.079       | 1.350     |          |           |          | L Anterior Cingulum       | ME/CFS | 15 | 6.740 | 1.174 | 0.797  | 28 | 0.432 | Controls | 15 | 6.405 | 1.125 | R Mid Cingulum            | ME/CFS | 15 | 6.243 | 0.667 | -0.422 | 28 | 0.676 | Controls | 15 | 6.348 | 0.695 | L Mid Cingulum            | ME/CFS | 15 | 6.140 | 0.691 | -0.667 | 28 | 0.510 | Controls | 15 | 6.300 | 0.620 | R Posterior Cingulum      | ME/CFS | 15 | 5.505 | 0.572 | 0.136  | 28 | 0.893 | Controls | 15 | 5.476 | 0.608 | L Posterior Cingulum      | ME/CFS | 15 | 5.006 | 0.688 | 0.313  | 28 | 0.757 | Controls | 15 | 4.932 | 0.604 | R Hippocampus             | ME/CFS | 15 | 4.500 | 0.656 | 0.253  | 28 | 0.802 | Controls | 15 | 4.436 | 0.734 | L Hippocampus             | ME/CFS | 15 | 5.054 | 0.869 | 0.286  | 28 | 0.777 | Controls | 15 | 4.976 | 0.586 | R Calcarine          | ME/CFS | 15 | 7.842 | 1.305 | 1.201  | 28 | 0.240 | Controls | 15 | 7.340 | 0.957 | L Calcarine          | ME/CFS | 15 | 7.472 | 1.305 | 0.527  | 28 | 0.602 | Controls | 15 | 7.254 | 0.916 |                      |        |    |       |       |        |    |       |          |    |       |       |                      |        |    |       |       |        |    |       |          |    |       |       |                      |        |    |       |       |        |    |       |          |    |       |       |                      |        |    |       |       |        |    |       |          |    |       |       |                      |        |    |       |       |       |    |       |          |    |       |       |                      |        |    |       |       |       |    |       |          |    |       |       |               |        |    |       |       |       |    |       |          |    |       |       |               |        |    |       |       |       |    |       |          |    |       |       |             |        |    |       |       |       |    |       |          |    |       |       |             |        |    |       |       |       |    |       |
| L Anterior Cingulum       | ME/CFS       | 15       | 6.740       | 1.174     | 0.797    | 28        | 0.432    |                           |        |    |       |       |        |    |       |          |    |       |       |                           |        |    |       |       |        |    |       |          |    |       |       |                           |        |    |       |       |        |    |       |          |    |       |       |                           |        |    |       |       |        |    |       |          |    |       |       |                           |        |    |       |       |        |    |       |          |    |       |       |                           |        |    |       |       |        |    |       |          |    |       |       |                           |        |    |       |       |        |    |       |          |    |       |       |                      |        |    |       |       |        |    |       |          |    |       |       |                      |        |    |       |       |        |    |       |          |    |       |       |                      |        |    |       |       |        |    |       |          |    |       |       |                      |        |    |       |       |        |    |       |          |    |       |       |                      |        |    |       |       |        |    |       |          |    |       |       |                      |        |    |       |       |        |    |       |          |    |       |       |                      |        |    |       |       |       |    |       |          |    |       |       |                      |        |    |       |       |       |    |       |          |    |       |       |               |        |    |       |       |       |    |       |          |    |       |       |               |        |    |       |       |       |    |       |          |    |       |       |             |        |    |       |       |       |    |       |          |    |       |       |             |        |    |       |       |       |    |       |
|                           | Controls     | 15       | 6.405       | 1.125     |          |           |          | R Mid Cingulum            | ME/CFS | 15 | 6.243 | 0.667 | -0.422 | 28 | 0.676 | Controls | 15 | 6.348 | 0.695 | L Mid Cingulum            | ME/CFS | 15 | 6.140 | 0.691 | -0.667 | 28 | 0.510 | Controls | 15 | 6.300 | 0.620 | R Posterior Cingulum      | ME/CFS | 15 | 5.505 | 0.572 | 0.136  | 28 | 0.893 | Controls | 15 | 5.476 | 0.608 | L Posterior Cingulum      | ME/CFS | 15 | 5.006 | 0.688 | 0.313  | 28 | 0.757 | Controls | 15 | 4.932 | 0.604 | R Hippocampus             | ME/CFS | 15 | 4.500 | 0.656 | 0.253  | 28 | 0.802 | Controls | 15 | 4.436 | 0.734 | L Hippocampus             | ME/CFS | 15 | 5.054 | 0.869 | 0.286  | 28 | 0.777 | Controls | 15 | 4.976 | 0.586 | R Calcarine               | ME/CFS | 15 | 7.842 | 1.305 | 1.201  | 28 | 0.240 | Controls | 15 | 7.340 | 0.957 | L Calcarine          | ME/CFS | 15 | 7.472 | 1.305 | 0.527  | 28 | 0.602 | Controls | 15 | 7.254 | 0.916 |                      |        |    |       |       |        |    |       |          |    |       |       |                      |        |    |       |       |        |    |       |          |    |       |       |                      |        |    |       |       |        |    |       |          |    |       |       |                      |        |    |       |       |        |    |       |          |    |       |       |                      |        |    |       |       |        |    |       |          |    |       |       |                      |        |    |       |       |       |    |       |          |    |       |       |                      |        |    |       |       |       |    |       |          |    |       |       |               |        |    |       |       |       |    |       |          |    |       |       |               |        |    |       |       |       |    |       |          |    |       |       |             |        |    |       |       |       |    |       |          |    |       |       |             |        |    |       |       |       |    |       |
| R Mid Cingulum            | ME/CFS       | 15       | 6.243       | 0.667     | -0.422   | 28        | 0.676    |                           |        |    |       |       |        |    |       |          |    |       |       |                           |        |    |       |       |        |    |       |          |    |       |       |                           |        |    |       |       |        |    |       |          |    |       |       |                           |        |    |       |       |        |    |       |          |    |       |       |                           |        |    |       |       |        |    |       |          |    |       |       |                           |        |    |       |       |        |    |       |          |    |       |       |                           |        |    |       |       |        |    |       |          |    |       |       |                      |        |    |       |       |        |    |       |          |    |       |       |                      |        |    |       |       |        |    |       |          |    |       |       |                      |        |    |       |       |        |    |       |          |    |       |       |                      |        |    |       |       |        |    |       |          |    |       |       |                      |        |    |       |       |        |    |       |          |    |       |       |                      |        |    |       |       |        |    |       |          |    |       |       |                      |        |    |       |       |       |    |       |          |    |       |       |                      |        |    |       |       |       |    |       |          |    |       |       |               |        |    |       |       |       |    |       |          |    |       |       |               |        |    |       |       |       |    |       |          |    |       |       |             |        |    |       |       |       |    |       |          |    |       |       |             |        |    |       |       |       |    |       |
|                           | Controls     | 15       | 6.348       | 0.695     |          |           |          | L Mid Cingulum            | ME/CFS | 15 | 6.140 | 0.691 | -0.667 | 28 | 0.510 | Controls | 15 | 6.300 | 0.620 | R Posterior Cingulum      | ME/CFS | 15 | 5.505 | 0.572 | 0.136  | 28 | 0.893 | Controls | 15 | 5.476 | 0.608 | L Posterior Cingulum      | ME/CFS | 15 | 5.006 | 0.688 | 0.313  | 28 | 0.757 | Controls | 15 | 4.932 | 0.604 | R Hippocampus             | ME/CFS | 15 | 4.500 | 0.656 | 0.253  | 28 | 0.802 | Controls | 15 | 4.436 | 0.734 | L Hippocampus             | ME/CFS | 15 | 5.054 | 0.869 | 0.286  | 28 | 0.777 | Controls | 15 | 4.976 | 0.586 | R Calcarine               | ME/CFS | 15 | 7.842 | 1.305 | 1.201  | 28 | 0.240 | Controls | 15 | 7.340 | 0.957 | L Calcarine               | ME/CFS | 15 | 7.472 | 1.305 | 0.527  | 28 | 0.602 | Controls | 15 | 7.254 | 0.916 |                      |        |    |       |       |        |    |       |          |    |       |       |                      |        |    |       |       |        |    |       |          |    |       |       |                      |        |    |       |       |        |    |       |          |    |       |       |                      |        |    |       |       |        |    |       |          |    |       |       |                      |        |    |       |       |        |    |       |          |    |       |       |                      |        |    |       |       |        |    |       |          |    |       |       |                      |        |    |       |       |       |    |       |          |    |       |       |                      |        |    |       |       |       |    |       |          |    |       |       |               |        |    |       |       |       |    |       |          |    |       |       |               |        |    |       |       |       |    |       |          |    |       |       |             |        |    |       |       |       |    |       |          |    |       |       |             |        |    |       |       |       |    |       |
| L Mid Cingulum            | ME/CFS       | 15       | 6.140       | 0.691     | -0.667   | 28        | 0.510    |                           |        |    |       |       |        |    |       |          |    |       |       |                           |        |    |       |       |        |    |       |          |    |       |       |                           |        |    |       |       |        |    |       |          |    |       |       |                           |        |    |       |       |        |    |       |          |    |       |       |                           |        |    |       |       |        |    |       |          |    |       |       |                           |        |    |       |       |        |    |       |          |    |       |       |                           |        |    |       |       |        |    |       |          |    |       |       |                      |        |    |       |       |        |    |       |          |    |       |       |                      |        |    |       |       |        |    |       |          |    |       |       |                      |        |    |       |       |        |    |       |          |    |       |       |                      |        |    |       |       |        |    |       |          |    |       |       |                      |        |    |       |       |        |    |       |          |    |       |       |                      |        |    |       |       |        |    |       |          |    |       |       |                      |        |    |       |       |       |    |       |          |    |       |       |                      |        |    |       |       |       |    |       |          |    |       |       |               |        |    |       |       |       |    |       |          |    |       |       |               |        |    |       |       |       |    |       |          |    |       |       |             |        |    |       |       |       |    |       |          |    |       |       |             |        |    |       |       |       |    |       |
|                           | Controls     | 15       | 6.300       | 0.620     |          |           |          | R Posterior Cingulum      | ME/CFS | 15 | 5.505 | 0.572 | 0.136  | 28 | 0.893 | Controls | 15 | 5.476 | 0.608 | L Posterior Cingulum      | ME/CFS | 15 | 5.006 | 0.688 | 0.313  | 28 | 0.757 | Controls | 15 | 4.932 | 0.604 | R Hippocampus             | ME/CFS | 15 | 4.500 | 0.656 | 0.253  | 28 | 0.802 | Controls | 15 | 4.436 | 0.734 | L Hippocampus             | ME/CFS | 15 | 5.054 | 0.869 | 0.286  | 28 | 0.777 | Controls | 15 | 4.976 | 0.586 | R Calcarine               | ME/CFS | 15 | 7.842 | 1.305 | 1.201  | 28 | 0.240 | Controls | 15 | 7.340 | 0.957 | L Calcarine               | ME/CFS | 15 | 7.472 | 1.305 | 0.527  | 28 | 0.602 | Controls | 15 | 7.254 | 0.916 |                           |        |    |       |       |        |    |       |          |    |       |       |                      |        |    |       |       |        |    |       |          |    |       |       |                      |        |    |       |       |        |    |       |          |    |       |       |                      |        |    |       |       |        |    |       |          |    |       |       |                      |        |    |       |       |        |    |       |          |    |       |       |                      |        |    |       |       |        |    |       |          |    |       |       |                      |        |    |       |       |        |    |       |          |    |       |       |                      |        |    |       |       |       |    |       |          |    |       |       |                      |        |    |       |       |       |    |       |          |    |       |       |               |        |    |       |       |       |    |       |          |    |       |       |               |        |    |       |       |       |    |       |          |    |       |       |             |        |    |       |       |       |    |       |          |    |       |       |             |        |    |       |       |       |    |       |
| R Posterior Cingulum      | ME/CFS       | 15       | 5.505       | 0.572     | 0.136    | 28        | 0.893    |                           |        |    |       |       |        |    |       |          |    |       |       |                           |        |    |       |       |        |    |       |          |    |       |       |                           |        |    |       |       |        |    |       |          |    |       |       |                           |        |    |       |       |        |    |       |          |    |       |       |                           |        |    |       |       |        |    |       |          |    |       |       |                           |        |    |       |       |        |    |       |          |    |       |       |                           |        |    |       |       |        |    |       |          |    |       |       |                      |        |    |       |       |        |    |       |          |    |       |       |                      |        |    |       |       |        |    |       |          |    |       |       |                      |        |    |       |       |        |    |       |          |    |       |       |                      |        |    |       |       |        |    |       |          |    |       |       |                      |        |    |       |       |        |    |       |          |    |       |       |                      |        |    |       |       |        |    |       |          |    |       |       |                      |        |    |       |       |       |    |       |          |    |       |       |                      |        |    |       |       |       |    |       |          |    |       |       |               |        |    |       |       |       |    |       |          |    |       |       |               |        |    |       |       |       |    |       |          |    |       |       |             |        |    |       |       |       |    |       |          |    |       |       |             |        |    |       |       |       |    |       |
|                           | Controls     | 15       | 5.476       | 0.608     |          |           |          | L Posterior Cingulum      | ME/CFS | 15 | 5.006 | 0.688 | 0.313  | 28 | 0.757 | Controls | 15 | 4.932 | 0.604 | R Hippocampus             | ME/CFS | 15 | 4.500 | 0.656 | 0.253  | 28 | 0.802 | Controls | 15 | 4.436 | 0.734 | L Hippocampus             | ME/CFS | 15 | 5.054 | 0.869 | 0.286  | 28 | 0.777 | Controls | 15 | 4.976 | 0.586 | R Calcarine               | ME/CFS | 15 | 7.842 | 1.305 | 1.201  | 28 | 0.240 | Controls | 15 | 7.340 | 0.957 | L Calcarine               | ME/CFS | 15 | 7.472 | 1.305 | 0.527  | 28 | 0.602 | Controls | 15 | 7.254 | 0.916 |                           |        |    |       |       |        |    |       |          |    |       |       |                           |        |    |       |       |        |    |       |          |    |       |       |                      |        |    |       |       |        |    |       |          |    |       |       |                      |        |    |       |       |        |    |       |          |    |       |       |                      |        |    |       |       |        |    |       |          |    |       |       |                      |        |    |       |       |        |    |       |          |    |       |       |                      |        |    |       |       |        |    |       |          |    |       |       |                      |        |    |       |       |        |    |       |          |    |       |       |                      |        |    |       |       |       |    |       |          |    |       |       |                      |        |    |       |       |       |    |       |          |    |       |       |               |        |    |       |       |       |    |       |          |    |       |       |               |        |    |       |       |       |    |       |          |    |       |       |             |        |    |       |       |       |    |       |          |    |       |       |             |        |    |       |       |       |    |       |
| L Posterior Cingulum      | ME/CFS       | 15       | 5.006       | 0.688     | 0.313    | 28        | 0.757    |                           |        |    |       |       |        |    |       |          |    |       |       |                           |        |    |       |       |        |    |       |          |    |       |       |                           |        |    |       |       |        |    |       |          |    |       |       |                           |        |    |       |       |        |    |       |          |    |       |       |                           |        |    |       |       |        |    |       |          |    |       |       |                           |        |    |       |       |        |    |       |          |    |       |       |                           |        |    |       |       |        |    |       |          |    |       |       |                      |        |    |       |       |        |    |       |          |    |       |       |                      |        |    |       |       |        |    |       |          |    |       |       |                      |        |    |       |       |        |    |       |          |    |       |       |                      |        |    |       |       |        |    |       |          |    |       |       |                      |        |    |       |       |        |    |       |          |    |       |       |                      |        |    |       |       |        |    |       |          |    |       |       |                      |        |    |       |       |       |    |       |          |    |       |       |                      |        |    |       |       |       |    |       |          |    |       |       |               |        |    |       |       |       |    |       |          |    |       |       |               |        |    |       |       |       |    |       |          |    |       |       |             |        |    |       |       |       |    |       |          |    |       |       |             |        |    |       |       |       |    |       |
|                           | Controls     | 15       | 4.932       | 0.604     |          |           |          | R Hippocampus             | ME/CFS | 15 | 4.500 | 0.656 | 0.253  | 28 | 0.802 | Controls | 15 | 4.436 | 0.734 | L Hippocampus             | ME/CFS | 15 | 5.054 | 0.869 | 0.286  | 28 | 0.777 | Controls | 15 | 4.976 | 0.586 | R Calcarine               | ME/CFS | 15 | 7.842 | 1.305 | 1.201  | 28 | 0.240 | Controls | 15 | 7.340 | 0.957 | L Calcarine               | ME/CFS | 15 | 7.472 | 1.305 | 0.527  | 28 | 0.602 | Controls | 15 | 7.254 | 0.916 |                           |        |    |       |       |        |    |       |          |    |       |       |                           |        |    |       |       |        |    |       |          |    |       |       |                           |        |    |       |       |        |    |       |          |    |       |       |                      |        |    |       |       |        |    |       |          |    |       |       |                      |        |    |       |       |        |    |       |          |    |       |       |                      |        |    |       |       |        |    |       |          |    |       |       |                      |        |    |       |       |        |    |       |          |    |       |       |                      |        |    |       |       |        |    |       |          |    |       |       |                      |        |    |       |       |        |    |       |          |    |       |       |                      |        |    |       |       |       |    |       |          |    |       |       |                      |        |    |       |       |       |    |       |          |    |       |       |               |        |    |       |       |       |    |       |          |    |       |       |               |        |    |       |       |       |    |       |          |    |       |       |             |        |    |       |       |       |    |       |          |    |       |       |             |        |    |       |       |       |    |       |
| R Hippocampus             | ME/CFS       | 15       | 4.500       | 0.656     | 0.253    | 28        | 0.802    |                           |        |    |       |       |        |    |       |          |    |       |       |                           |        |    |       |       |        |    |       |          |    |       |       |                           |        |    |       |       |        |    |       |          |    |       |       |                           |        |    |       |       |        |    |       |          |    |       |       |                           |        |    |       |       |        |    |       |          |    |       |       |                           |        |    |       |       |        |    |       |          |    |       |       |                           |        |    |       |       |        |    |       |          |    |       |       |                      |        |    |       |       |        |    |       |          |    |       |       |                      |        |    |       |       |        |    |       |          |    |       |       |                      |        |    |       |       |        |    |       |          |    |       |       |                      |        |    |       |       |        |    |       |          |    |       |       |                      |        |    |       |       |        |    |       |          |    |       |       |                      |        |    |       |       |        |    |       |          |    |       |       |                      |        |    |       |       |       |    |       |          |    |       |       |                      |        |    |       |       |       |    |       |          |    |       |       |               |        |    |       |       |       |    |       |          |    |       |       |               |        |    |       |       |       |    |       |          |    |       |       |             |        |    |       |       |       |    |       |          |    |       |       |             |        |    |       |       |       |    |       |
|                           | Controls     | 15       | 4.436       | 0.734     |          |           |          | L Hippocampus             | ME/CFS | 15 | 5.054 | 0.869 | 0.286  | 28 | 0.777 | Controls | 15 | 4.976 | 0.586 | R Calcarine               | ME/CFS | 15 | 7.842 | 1.305 | 1.201  | 28 | 0.240 | Controls | 15 | 7.340 | 0.957 | L Calcarine               | ME/CFS | 15 | 7.472 | 1.305 | 0.527  | 28 | 0.602 | Controls | 15 | 7.254 | 0.916 |                           |        |    |       |       |        |    |       |          |    |       |       |                           |        |    |       |       |        |    |       |          |    |       |       |                           |        |    |       |       |        |    |       |          |    |       |       |                           |        |    |       |       |        |    |       |          |    |       |       |                      |        |    |       |       |        |    |       |          |    |       |       |                      |        |    |       |       |        |    |       |          |    |       |       |                      |        |    |       |       |        |    |       |          |    |       |       |                      |        |    |       |       |        |    |       |          |    |       |       |                      |        |    |       |       |        |    |       |          |    |       |       |                      |        |    |       |       |        |    |       |          |    |       |       |                      |        |    |       |       |       |    |       |          |    |       |       |                      |        |    |       |       |       |    |       |          |    |       |       |               |        |    |       |       |       |    |       |          |    |       |       |               |        |    |       |       |       |    |       |          |    |       |       |             |        |    |       |       |       |    |       |          |    |       |       |             |        |    |       |       |       |    |       |
| L Hippocampus             | ME/CFS       | 15       | 5.054       | 0.869     | 0.286    | 28        | 0.777    |                           |        |    |       |       |        |    |       |          |    |       |       |                           |        |    |       |       |        |    |       |          |    |       |       |                           |        |    |       |       |        |    |       |          |    |       |       |                           |        |    |       |       |        |    |       |          |    |       |       |                           |        |    |       |       |        |    |       |          |    |       |       |                           |        |    |       |       |        |    |       |          |    |       |       |                           |        |    |       |       |        |    |       |          |    |       |       |                      |        |    |       |       |        |    |       |          |    |       |       |                      |        |    |       |       |        |    |       |          |    |       |       |                      |        |    |       |       |        |    |       |          |    |       |       |                      |        |    |       |       |        |    |       |          |    |       |       |                      |        |    |       |       |        |    |       |          |    |       |       |                      |        |    |       |       |        |    |       |          |    |       |       |                      |        |    |       |       |       |    |       |          |    |       |       |                      |        |    |       |       |       |    |       |          |    |       |       |               |        |    |       |       |       |    |       |          |    |       |       |               |        |    |       |       |       |    |       |          |    |       |       |             |        |    |       |       |       |    |       |          |    |       |       |             |        |    |       |       |       |    |       |
|                           | Controls     | 15       | 4.976       | 0.586     |          |           |          | R Calcarine               | ME/CFS | 15 | 7.842 | 1.305 | 1.201  | 28 | 0.240 | Controls | 15 | 7.340 | 0.957 | L Calcarine               | ME/CFS | 15 | 7.472 | 1.305 | 0.527  | 28 | 0.602 | Controls | 15 | 7.254 | 0.916 |                           |        |    |       |       |        |    |       |          |    |       |       |                           |        |    |       |       |        |    |       |          |    |       |       |                           |        |    |       |       |        |    |       |          |    |       |       |                           |        |    |       |       |        |    |       |          |    |       |       |                           |        |    |       |       |        |    |       |          |    |       |       |                      |        |    |       |       |        |    |       |          |    |       |       |                      |        |    |       |       |        |    |       |          |    |       |       |                      |        |    |       |       |        |    |       |          |    |       |       |                      |        |    |       |       |        |    |       |          |    |       |       |                      |        |    |       |       |        |    |       |          |    |       |       |                      |        |    |       |       |        |    |       |          |    |       |       |                      |        |    |       |       |       |    |       |          |    |       |       |                      |        |    |       |       |       |    |       |          |    |       |       |               |        |    |       |       |       |    |       |          |    |       |       |               |        |    |       |       |       |    |       |          |    |       |       |             |        |    |       |       |       |    |       |          |    |       |       |             |        |    |       |       |       |    |       |
| R Calcarine               | ME/CFS       | 15       | 7.842       | 1.305     | 1.201    | 28        | 0.240    |                           |        |    |       |       |        |    |       |          |    |       |       |                           |        |    |       |       |        |    |       |          |    |       |       |                           |        |    |       |       |        |    |       |          |    |       |       |                           |        |    |       |       |        |    |       |          |    |       |       |                           |        |    |       |       |        |    |       |          |    |       |       |                           |        |    |       |       |        |    |       |          |    |       |       |                           |        |    |       |       |        |    |       |          |    |       |       |                      |        |    |       |       |        |    |       |          |    |       |       |                      |        |    |       |       |        |    |       |          |    |       |       |                      |        |    |       |       |        |    |       |          |    |       |       |                      |        |    |       |       |        |    |       |          |    |       |       |                      |        |    |       |       |        |    |       |          |    |       |       |                      |        |    |       |       |        |    |       |          |    |       |       |                      |        |    |       |       |       |    |       |          |    |       |       |                      |        |    |       |       |       |    |       |          |    |       |       |               |        |    |       |       |       |    |       |          |    |       |       |               |        |    |       |       |       |    |       |          |    |       |       |             |        |    |       |       |       |    |       |          |    |       |       |             |        |    |       |       |       |    |       |
|                           | Controls     | 15       | 7.340       | 0.957     |          |           |          | L Calcarine               | ME/CFS | 15 | 7.472 | 1.305 | 0.527  | 28 | 0.602 | Controls | 15 | 7.254 | 0.916 |                           |        |    |       |       |        |    |       |          |    |       |       |                           |        |    |       |       |        |    |       |          |    |       |       |                           |        |    |       |       |        |    |       |          |    |       |       |                           |        |    |       |       |        |    |       |          |    |       |       |                           |        |    |       |       |        |    |       |          |    |       |       |                           |        |    |       |       |        |    |       |          |    |       |       |                      |        |    |       |       |        |    |       |          |    |       |       |                      |        |    |       |       |        |    |       |          |    |       |       |                      |        |    |       |       |        |    |       |          |    |       |       |                      |        |    |       |       |        |    |       |          |    |       |       |                      |        |    |       |       |        |    |       |          |    |       |       |                      |        |    |       |       |        |    |       |          |    |       |       |                      |        |    |       |       |       |    |       |          |    |       |       |                      |        |    |       |       |       |    |       |          |    |       |       |               |        |    |       |       |       |    |       |          |    |       |       |               |        |    |       |       |       |    |       |          |    |       |       |             |        |    |       |       |       |    |       |          |    |       |       |             |        |    |       |       |       |    |       |
| L Calcarine               | ME/CFS       | 15       | 7.472       | 1.305     | 0.527    | 28        | 0.602    |                           |        |    |       |       |        |    |       |          |    |       |       |                           |        |    |       |       |        |    |       |          |    |       |       |                           |        |    |       |       |        |    |       |          |    |       |       |                           |        |    |       |       |        |    |       |          |    |       |       |                           |        |    |       |       |        |    |       |          |    |       |       |                           |        |    |       |       |        |    |       |          |    |       |       |                           |        |    |       |       |        |    |       |          |    |       |       |                      |        |    |       |       |        |    |       |          |    |       |       |                      |        |    |       |       |        |    |       |          |    |       |       |                      |        |    |       |       |        |    |       |          |    |       |       |                      |        |    |       |       |        |    |       |          |    |       |       |                      |        |    |       |       |        |    |       |          |    |       |       |                      |        |    |       |       |        |    |       |          |    |       |       |                      |        |    |       |       |       |    |       |          |    |       |       |                      |        |    |       |       |       |    |       |          |    |       |       |               |        |    |       |       |       |    |       |          |    |       |       |               |        |    |       |       |       |    |       |          |    |       |       |             |        |    |       |       |       |    |       |          |    |       |       |             |        |    |       |       |       |    |       |
|                           | Controls     | 15       | 7.254       | 0.916     |          |           |          |                           |        |    |       |       |        |    |       |          |    |       |       |                           |        |    |       |       |        |    |       |          |    |       |       |                           |        |    |       |       |        |    |       |          |    |       |       |                           |        |    |       |       |        |    |       |          |    |       |       |                           |        |    |       |       |        |    |       |          |    |       |       |                           |        |    |       |       |        |    |       |          |    |       |       |                           |        |    |       |       |        |    |       |          |    |       |       |                      |        |    |       |       |        |    |       |          |    |       |       |                      |        |    |       |       |        |    |       |          |    |       |       |                      |        |    |       |       |        |    |       |          |    |       |       |                      |        |    |       |       |        |    |       |          |    |       |       |                      |        |    |       |       |        |    |       |          |    |       |       |                      |        |    |       |       |        |    |       |          |    |       |       |                      |        |    |       |       |       |    |       |          |    |       |       |                      |        |    |       |       |       |    |       |          |    |       |       |               |        |    |       |       |       |    |       |          |    |       |       |               |        |    |       |       |       |    |       |          |    |       |       |             |        |    |       |       |       |    |       |          |    |       |       |             |        |    |       |       |       |    |       |

|                      |          |    |       |       |        |         |        |
|----------------------|----------|----|-------|-------|--------|---------|--------|
| R Cuneus             | ME/CFS   | 15 | 8.007 | 1.654 | 0.804  | 28      | 0.428  |
|                      | Controls | 15 | 7.593 | 1.113 |        |         |        |
| L Cuneus             | ME/CFS   | 15 | 7.925 | 1.775 | 0.265  | 22.417† | 0.794  |
|                      | Controls | 15 | 7.784 | 1.026 |        |         |        |
| R Lingual Gyrus      | ME/CFS   | 15 | 7.094 | 1.207 | 1.438  | 28      | 0.161  |
|                      | Controls | 15 | 6.527 | 0.936 |        |         |        |
| L Lingual Gyrus      | ME/CFS   | 15 | 6.622 | 1.046 | 0.168  | 28      | 0.868  |
|                      | Controls | 15 | 6.563 | 0.873 |        |         |        |
| R Occipital Lobe     | ME/CFS   | 15 | 8.800 | 1.410 | 1.059  | 28      | 0.299  |
|                      | Controls | 15 | 8.319 | 1.048 |        |         |        |
| L Occipital Lobe     | ME/CFS   | 15 | 7.614 | 1.483 | -0.489 | 28      | 0.629  |
|                      | Controls | 15 | 7.841 | 1.015 |        |         |        |
| R Fusiform Gyrus     | ME/CFS   | 15 | 7.317 | 1.270 | 1.648  | 28      | 0.111  |
|                      | Controls | 15 | 6.637 | 0.970 |        |         |        |
| L Fusiform Gyrus     | ME/CFS   | 15 | 6.436 | 0.830 | -0.594 | 28      | 0.557  |
|                      | Controls | 15 | 6.614 | 0.807 |        |         |        |
| R Postcentral Gyrus  | ME/CFS   | 15 | 6.751 | 0.713 | -1.406 | 28      | 0.171  |
|                      | Controls | 15 | 7.165 | 0.890 |        |         |        |
| L Postcentral Gyrus  | ME/CFS   | 15 | 6.150 | 1.157 | -1.596 | 28      | 0.122  |
|                      | Controls | 15 | 6.768 | 0.951 |        |         |        |
| R Parietal Lobe      | ME/CFS   | 15 | 8.234 | 1.148 | 0.033  | 28      | 0.974  |
|                      | Controls | 15 | 8.221 | 0.985 |        |         |        |
| L Parietal Lobe      | ME/CFS   | 15 | 6.417 | 1.056 | -2.323 | 28      | 0.028* |
|                      | Controls | 15 | 7.252 | 0.907 |        |         |        |
| R Precuneus          | ME/CFS   | 15 | 6.816 | 1.013 | -0.399 | 28      | 0.693  |
|                      | Controls | 15 | 6.963 | 1.014 |        |         |        |
| L Precuneus          | ME/CFS   | 15 | 6.405 | 1.022 | -0.838 | 28      | 0.409  |
|                      | Controls | 15 | 6.694 | 0.859 |        |         |        |
| R Paracentral Lobule | ME/CFS   | 15 | 5.683 | 1.073 | -0.944 | 28      | 0.353  |
|                      | Controls | 15 | 6.074 | 1.186 |        |         |        |
| L Paracentral Lobule | ME/CFS   | 15 | 5.567 | 1.093 | -1.589 | 28      | 0.123  |
|                      | Controls | 15 | 6.211 | 1.126 |        |         |        |
| R Caudate            | ME/CFS   | 15 | 4.770 | 1.093 | -0.715 | 22.427† | 0.482  |
|                      | Controls | 15 | 5.003 | 0.632 |        |         |        |
| L Caudate            | ME/CFS   | 15 | 5.136 | 1.157 | 1.894  | 17.628† | 0.075  |
|                      | Controls | 15 | 4.534 | 0.420 |        |         |        |
| R Putamen            | ME/CFS   | 15 | 5.399 | 1.008 | -1.518 | 28      | 0.140  |
|                      | Controls | 15 | 5.921 | 0.870 |        |         |        |
| L Putamen            | ME/CFS   | 15 | 6.324 | 0.717 | 2.738  | 28      | 0.011* |
|                      | Controls | 15 | 5.694 | 0.529 |        |         |        |
| R Pallidum           | ME/CFS   | 14 | 4.827 | 1.268 | -0.072 | 27      | 0.943  |

|                 |          |    |       |       |        |    |       |
|-----------------|----------|----|-------|-------|--------|----|-------|
|                 | Controls | 15 | 4.857 | 0.938 |        |    |       |
| L Pallidum      | ME/CFS   | 14 | 5.207 | 1.134 | 0.725  | 27 | 0.475 |
|                 | Controls | 15 | 4.937 | 0.861 |        |    |       |
| R Thalamus      | ME/CFS   | 15 | 4.228 | 0.727 | -0.100 | 28 | 0.921 |
|                 | Controls | 15 | 4.254 | 0.725 |        |    |       |
| L Thalamus      | ME/CFS   | 15 | 4.717 | 0.932 | 0.867  | 28 | 0.394 |
|                 | Controls | 15 | 4.453 | 0.725 |        |    |       |
| R Temporal Lobe | ME/CFS   | 15 | 7.374 | 0.949 | 0.400  | 28 | 0.692 |
|                 | Controls | 15 | 7.261 | 0.559 |        |    |       |
| L Temporal Lobe | ME/CFS   | 15 | 6.616 | 0.622 | -1.299 | 28 | 0.204 |
|                 | Controls | 15 | 6.879 | 0.477 |        |    |       |
| Cerebellum      | ME/CFS   | 15 | 7.168 | 1.450 | 0.321  | 28 | 0.750 |
|                 | Controls | 15 | 7.023 | 0.978 |        |    |       |

ROI = region of interest; L = left; R = right

†df adjusted for unequal variances between groups.

\*denotes significant group differences at  $p < 0.05$

Mean creatine (CR) area under curve (AUC) in the ME/CFS and control groups, and their standard deviations (SD).  $t$ -values and corresponding  $p$ -values are from independent-samples  $t$ -tests comparing the group means in each region.
