# Supplementary material
Source: PubMed Central journal article supplement (PMC6612467)
Supplement: NIHMS1518146-supplement-11682_2018_29_MOESM3_ESM.pdf [file NIHMS1518146-supplement-11682_2018_29_MOESM3_ESM.pdf]

**Evidence of widespread metabolite abnormalities in Myalgic Encephalomyelitis/Chronic Fatigue Syndrome: Assessment with whole-brain Magnetic Resonance Spectroscopy.**

**Brain Imaging and Behavior**

**Christina Mueller, MS**

Department of Psychology, The University of Alabama at Birmingham, 1720 2nd Ave S, Birmingham, AL 35294, United States

**Joanne C. Lin, PhD**

Department of Psychology, The University of Alabama at Birmingham, 1720 2nd Ave S, Birmingham, AL 35294, United States

**Sulaiman Sheriff**

Department of Radiology, Miller School of Medicine, University of Miami, 1600 NW 10th Ave #1140, Miami, FL 33136, United States

**Andrew A. Maudsley, PhD**

Department of Radiology, Miller School of Medicine, University of Miami, 1600 NW 10th Ave #1140, Miami, FL 33136, United States

**Jarred W. Younger, PhD (corresponding author)**

Department of Psychology, The University of Alabama at Birmingham, 1720 2nd Ave S, Birmingham, AL 35294, United States

younger@uab.edu

P: (205) 975-5821

| <b>ROI</b>      | <b>Group</b> | <b>Mean</b> | <b>SD</b> | <b><i>t</i></b> | <b><i>p</i></b> |
|-----------------|--------------|-------------|-----------|-----------------|-----------------|
| Calcarine_R     | ME/CFS       | 59.208      | 11.017    | -0.429          | 0.671           |
|                 | control      | 61.133      | 13.419    |                 |                 |
| Cerebellum      | ME/CFS       | 65.756      | 11.568    | 0.115           | 0.909           |
|                 | control      | 65.283      | 10.942    |                 |                 |
| Cingulum_Ant_L  | ME/CFS       | 44.999      | 12.061    | -0.186          | 0.853           |
|                 | control      | 45.795      | 11.327    |                 |                 |
| Cingulum_Ant_R  | ME/CFS       | 36.038      | 15.281    | -0.352          | 0.728           |
|                 | control      | 37.682      | 9.678     |                 |                 |
| Cingulum_Mid_L  | ME/CFS       | 45.893      | 12.238    | 0.328           | 0.745           |
|                 | control      | 44.617      | 8.761     |                 |                 |
| Frontal_R       | ME/CFS       | 37.730      | 10.693    | 0.303           | 0.764           |
|                 | control      | 36.539      | 10.853    |                 |                 |
| Fusiform_R      | ME/CFS       | 54.362      | 8.316     | 0.256           | 0.800           |
|                 | control      | 53.401      | 11.909    |                 |                 |
| Hippocampus_L   | ME/CFS       | 51.437      | 13.070    | 0.591           | 0.559           |
|                 | control      | 48.488      | 14.250    |                 |                 |
| Insula_L        | ME/CFS       | 40.328      | 12.147    | 0.425           | 0.674           |
|                 | control      | 38.601      | 9.981     |                 |                 |
| Insula_R        | ME/CFS       | 47.261      | 14.044    | -0.434          | 0.668           |
|                 | control      | 49.276      | 11.226    |                 |                 |
| Lingual_L       | ME/CFS       | 65.429      | 11.180    | -1.226          | 0.231           |
|                 | control      | 70.483      | 11.405    |                 |                 |
| Lingual_R       | ME/CFS       | 65.317      | 9.525     | -0.724          | 0.475           |
|                 | control      | 68.239      | 12.410    |                 |                 |
| Occipital_R     | ME/CFS       | 50.260      | 12.302    | 1.389           | 0.176           |
|                 | control      | 44.165      | 11.726    |                 |                 |
| Pallidum_R      | ME/CFS       | 40.868      | 8.554     | -0.006          | 0.995           |
|                 | control      | 40.892      | 12.332    |                 |                 |
| Parietal_L      | ME/CFS       | 38.270      | 9.760     | 0.252           | 0.803           |
|                 | control      | 37.358      | 10.052    |                 |                 |
| Parietal_R      | ME/CFS       | 41.340      | 10.198    | -0.025          | 0.980           |
|                 | control      | 41.427      | 8.766     |                 |                 |
| Precuneus_L     | ME/CFS       | 47.928      | 8.632     | -0.649          | 0.521           |
|                 | control      | 50.234      | 10.708    |                 |                 |
| Putamen_R       | ME/CFS       | 36.809      | 8.430     | -0.289          | 0.775           |
|                 | control      | 37.918      | 12.252    |                 |                 |
| Rolandic_Oper_L | ME/CFS       | 44.296      | 10.888    | 0.279           | 0.782           |
|                 | control      | 43.184      | 10.938    |                 |                 |
| Temporal_L      | ME/CFS       | 44.296      | 9.513     | 0.723           | 0.476           |
|                 | control      | 41.829      | 9.188     |                 |                 |

|            |         |        |        |       |       |
|------------|---------|--------|--------|-------|-------|
| Temporal_R | ME/CFS  | 44.048 | 10.508 | 0.012 | 0.991 |
|            | control | 44.008 | 7.339  |       |       |
| Thalamus_R | ME/CFS  | 53.015 | 12.968 | 0.498 | 0.622 |
|            | control | 50.648 | 13.070 |       |       |

ROI = region of interest; L = left; R = right

Mean cerebral blood flow (CBF) in the ME/CFS (n = 15) and control (n = 15) group, and their standard deviations (SD). *t*-values and corresponding *p*-values are from independent-samples *t*-tests comparing the group means in each region. Df = 28 for all tests. Only regions showing metabolite differences between groups are presented.
